# Supplementary material for: Molybdenum oxide nanoparticles: preparation, characterization, and application in heterogeneous catalysis
Source: Royal Society of Chemistry journal article supplement (doi:10.1039/c1jm10252d), 2011-01-01

Electronic supplementary information for:

# Molybdenum Oxide Nanoparticles: Preparation, Characterization, and Application in Heterogeneous Catalysis

Le Xin Song\*, Mang Wang, Shu Zhen Pan, Jun Yang, Jie Chen and Jing Yang

*Department of Chemistry, University of Science and Technology of China,  
Hefei 230026, P. R. China  
solexin@ustc.edu.cn*

## A list of the contents for all the supporting information

| Page | Contents                                                                                                                                                                                                                                                                                                                           |
|------|------------------------------------------------------------------------------------------------------------------------------------------------------------------------------------------------------------------------------------------------------------------------------------------------------------------------------------|
| 1    | A table of contents page.                                                                                                                                                                                                                                                                                                          |
| 2    | Table 1. Physical properties of PTFE.                                                                                                                                                                                                                                                                                              |
| 3    | Fig. 1 TG curves of PTFE (a), NH <sub>4</sub> Cl (b), PTFE–NH <sub>4</sub> Cl (c) and the fitted theoretical curve based on a mixed form of PTFE and NH <sub>4</sub> Cl in a 1:6 molar ratio (d).                                                                                                                                  |
| 4    | Fig. 2 Raman spectra of the residues of PTFE (a), PTFE–AMT (b), PTFE–MoO <sub>3</sub> (c) and PTFE–NH <sub>4</sub> Cl (d) at 873 K for 2 h, and PTFE–AMT at 751 (e) and 837 K (f) for 30 min under nitrogen atmosphere. Relative signal intensity was normalized to the intensity of the peak at 1580 cm <sup>−1</sup> in curve b. |
| 5    | Fig. 3 XRD patterns of the residues of PTFE (a), PTFE–AMT (b), PTFE–MoO <sub>3</sub> (c) and PTFE–NH <sub>4</sub> Cl (d) at 873 K for 2 h, and PTFE–AMT at 751 (e) and 837 K (f) for 30 min under nitrogen atmosphere. Relative signal intensity was normalized to the intensity of the peak at 18.2° in curve a.                  |
| 6    | Fig. 4 FE-SEM images of the residues of PTFE (a), PTFE–AMT (b), PTFE–MoO <sub>3</sub> (c) and PTFE–NH <sub>4</sub> Cl (d) at 873 K for 2 h, and PTFE–AMT at 751 (e) and 837 K (f) for 30 min under nitrogen atmosphere.                                                                                                            |

**Table 1. Physical properties of PTFE.**

| Property              | Unit              | Nominal value |
|-----------------------|-------------------|---------------|
| Density               | g/dm <sup>3</sup> | 400           |
| Specific area         | m <sup>2</sup> /g | 10            |
| Average particle size | µm                | 5             |
| Melting point         | K                 | 600           |
| Moisture content      | %                 | 0.04          |

**Fig. 1 TG curves of PTFE (a),  $\text{NH}_4\text{Cl}$  (b), PTFE- $\text{NH}_4\text{Cl}$  (c) and the fitted theoretical curve based on a mixed form of PTFE and  $\text{NH}_4\text{Cl}$  in a 1:6 molar ratio (d).**

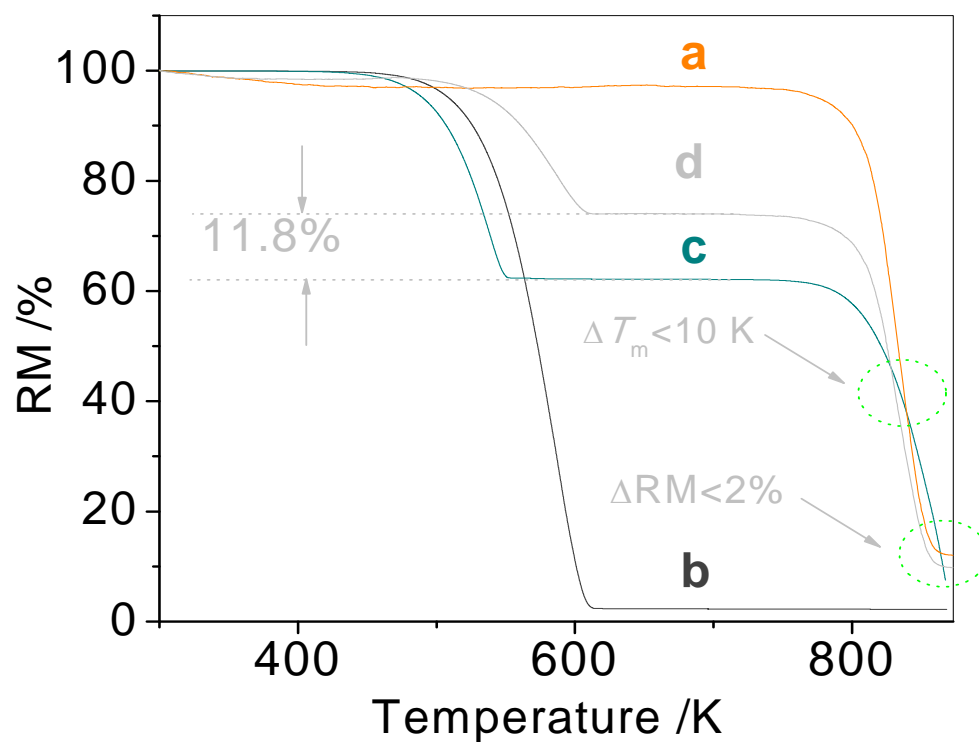

**Fig. 2 Raman spectra of the residues of PTFE (a), PTFE–AMT (b), PTFE–MoO<sub>3</sub> (c) and PTFE–NH<sub>4</sub>Cl (d) at 873 K for 2 h, and PTFE–AMT at 751 (e) and 837 K (f) for 30 min under nitrogen atmosphere. Relative signal intensity was normalized to the intensity of the peak at 1580 cm<sup>-1</sup> in curve b.**

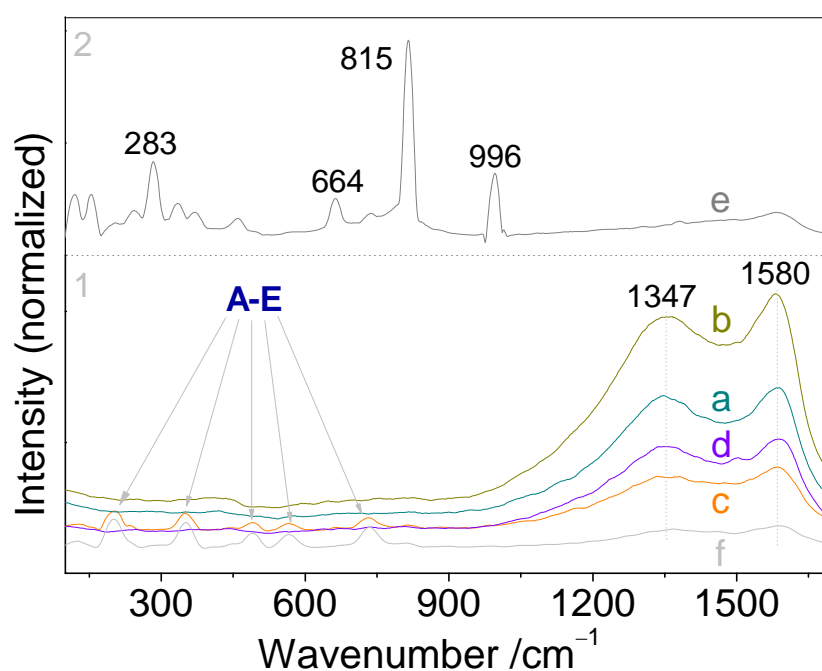

**Fig. 3 XRD patterns of the residues of PTFE (a), PTFE–AMT (b), PTFE–MoO<sub>3</sub> (c) and PTFE–NH<sub>4</sub>Cl (d) at 873 K for 2 h, and PTFE–AMT at 751 (e) and 837 K (f) for 30 min under nitrogen atmosphere. Relative signal intensity was normalized to the intensity of the peak at 18.2° in curve a.**

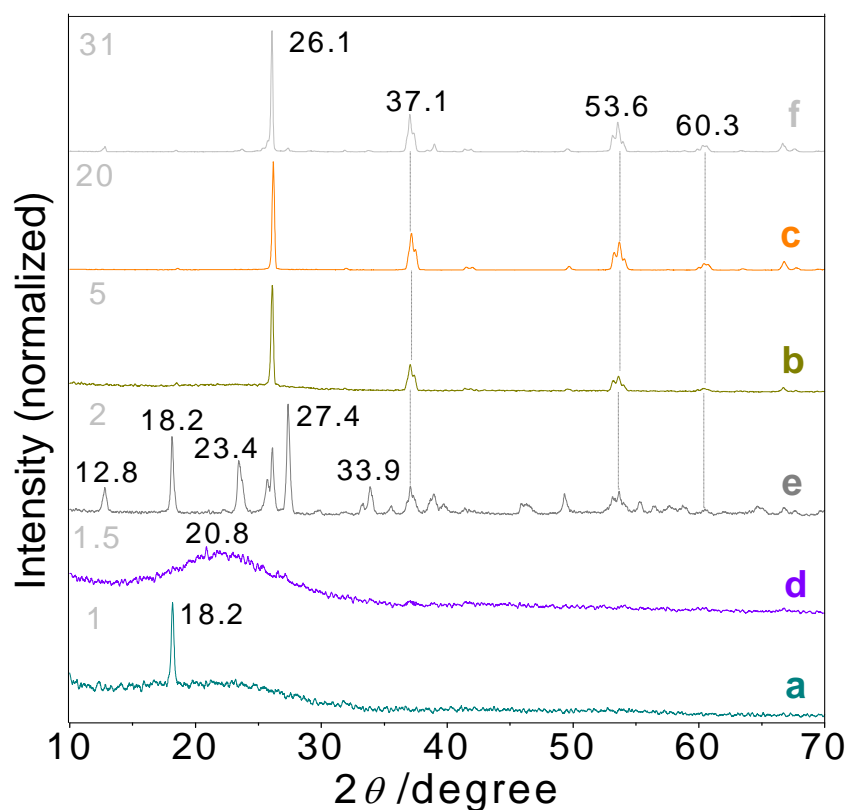

**Fig. 4 FE-SEM images of the residues of PTFE (a), PTFE-AMT (b), PTFE-MoO<sub>3</sub> (c) and PTFE-NH<sub>4</sub>Cl (d) at 873 K for 2 h, and PTFE-AMT at 751 (e) and 837 K (f) for 30 min under nitrogen atmosphere.**

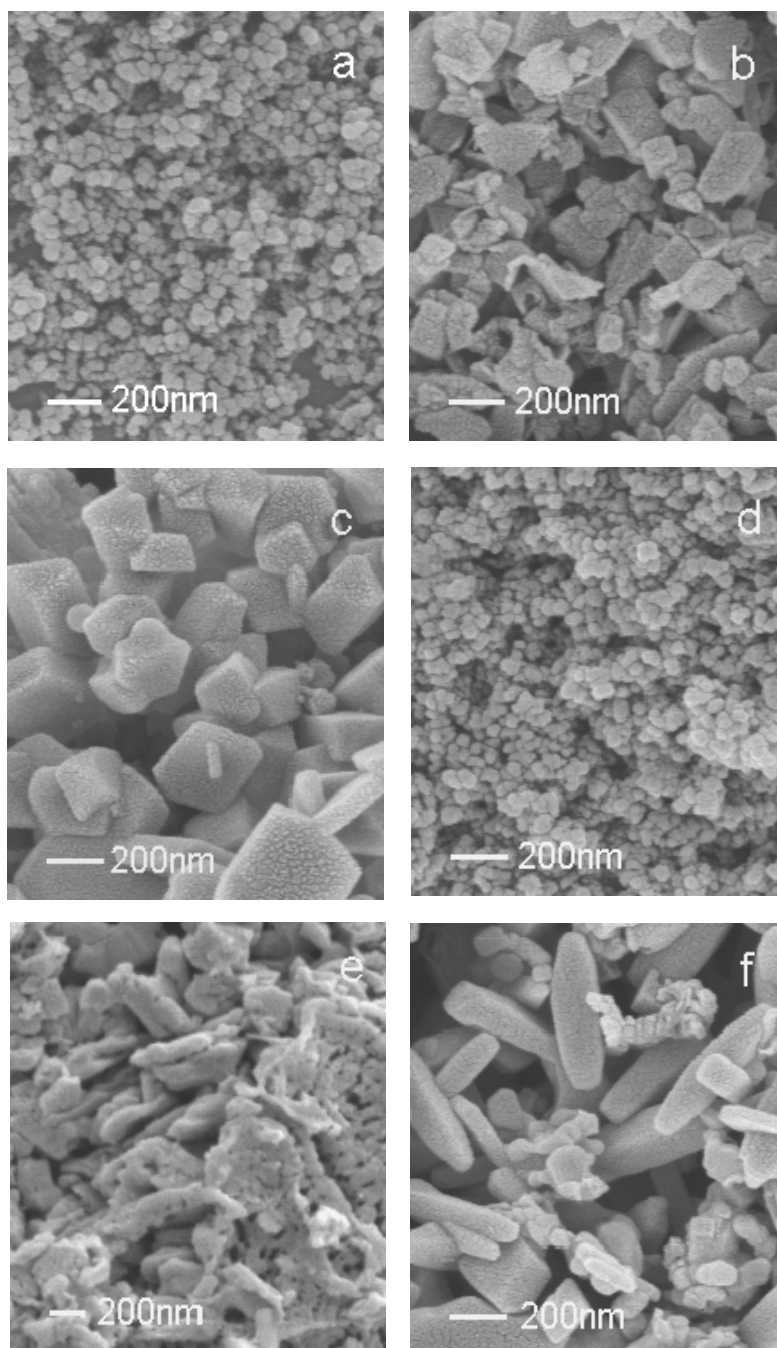

Supplement: c1jm10252d.pdf [file c1jm10252d.pdf]
